# Supplementary material for: Superparamagnetic amorphous iron oxide nanowires self-assembled into ordered layered structures
Source: Royal Society of Chemistry journal article supplement (doi:10.1039/c5ra10469f), 2015-01-01
Supplement: c5ra10469f1.pdf [file c5ra10469f1.pdf]

## Supporting Information

for RCS Advances, See DOI: 10.1039/b000000x/

### Superparamagnetic amorphous iron oxide nanowires self-assembled into ordered layered structures

*M. Iacob, D. Sirbu, C. Tuguia, G. Stiubianu, L. Sacarescu, V. Cozan, A. Zeleňáková, E. Čížmár, c  
A. Feher, and M. Cazacu*

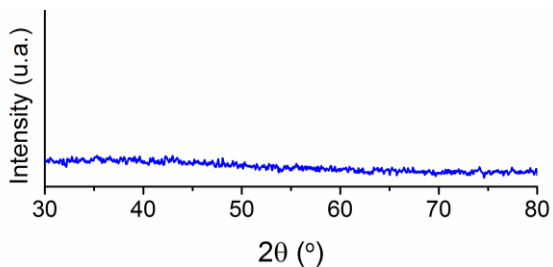

**Figure S1.** X-ray powder diffraction pattern (30–70° 2θ) of NWs

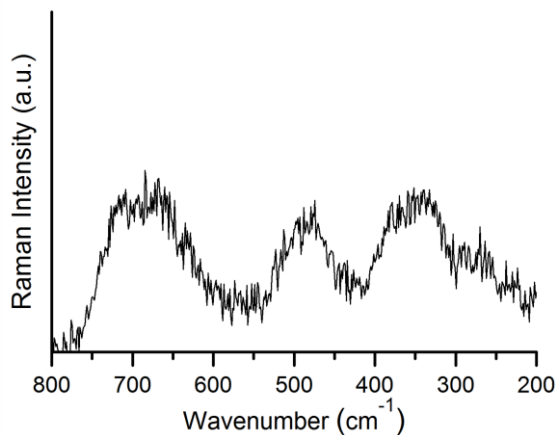

**Figure S2.** Raman spectrum of calcinated NWs
